# Supplementary material for: Consistency and Stability of Motor Subtype Classifications in Patients With de novo Parkinson’s Disease
Source: Front Neurosci. 2021 Mar 1;15:637896. doi: 10.3389/fnins.2021.637896 (PMC7957002; doi:10.3389/fnins.2021.637896)
Supplement: Supplementary file 1 [file Table_1.pdf]

### Supplementary Table 1

Demographic and clinical characteristics of the 79 PD patients at 1-month follow-up.

| Variables                         | 1-month follow-up (n=79) |
|-----------------------------------|--------------------------|
| Age (years)                       | 60.5 ± 7.3               |
| Gender (male)                     | 39 (49.4%)               |
| Formal education (years)          | 9.6 ± 3.7                |
| Age at onset (years)              | 58.5 ± 7.4               |
| Duration of symptom onset (years) | 2.1 ± 1.5                |
| UPDRS part II                     | 6.5 ± 3.4                |
| UPDRS part III                    | 18.4 ± 10.2              |
| Modified H-Y stage                | 1.5 ± 0.5                |
| MMSE                              | 27.7 ± 2.8               |
| MoCA                              | 24.1 ± 4.0               |
| HAMD                              | 8.0 ± 6.4                |
| HAMA                              | 6.2 ± 4.7                |
| PDSS                              | 125.7 ± 25.8             |
| NMSQuest                          | 7.2 ± 4.4                |
| LEDD                              | 74.5 ± 4.2               |

Data are presented as the mean ± SD and n (%). UPDRS, Unified Parkinson's Disease Rating Scale; H-Y, Hoehn and Yahr; MMSE, Mini-Mental State Examination; MoCA, Montreal Cognitive Assessment; HAMD, Hamilton Depression Scale; HAMA, Hamilton Anxiety Scale; PDSS, Parkinson Disease Sleep Scale; NMSQuest, Non-motor symptoms Questionnaire; LEDD, Levodopa Equivalent Daily Dose.
